# Supplementary material
Source: MDPI journal article supplement (https://www.mdpi.com/2071-1050/11/15/4107)
Supplement: s1 [file s1]

Supplementary Material 1

Eleven questions developed and delivered to the residents of Maolin District

| Information and Awareness                                                                                            |
|----------------------------------------------------------------------------------------------------------------------|
| 1. Do you have a computer? Do you have access to it?                                                                 |
| 2. During a typhoon, where is a safe place?                                                                          |
| 3. Do you know where the dangerous landslides happen in your community?                                              |
| 4. Does everyone in your community know how to evacuate? Where to go?                                                |
| 5. Do you know and understand you community evacuation plan?                                                         |
| 6. Is there a person you trust for information about landslides in your community?                                   |
| Economy and Natural Capital                                                                                          |
| 1. Do you work in your community?                                                                                    |
| 2. What do you hope for the future of Maolin?                                                                        |
| 3. How often do you travel out of your community to shop for daily goods?                                            |
| 4. When the government is doing construction in your community, are there any additional benefits to your community? |
| 5. How could the government reduce the risk of debris flows/landslides that affect your community?                   |

## Supplementary Materials 2

Maolin Village, Landslide Inventory Results (2004-2012), Zones A, B, C. (Base Images: FS-2 displayed on Google Earth platform)

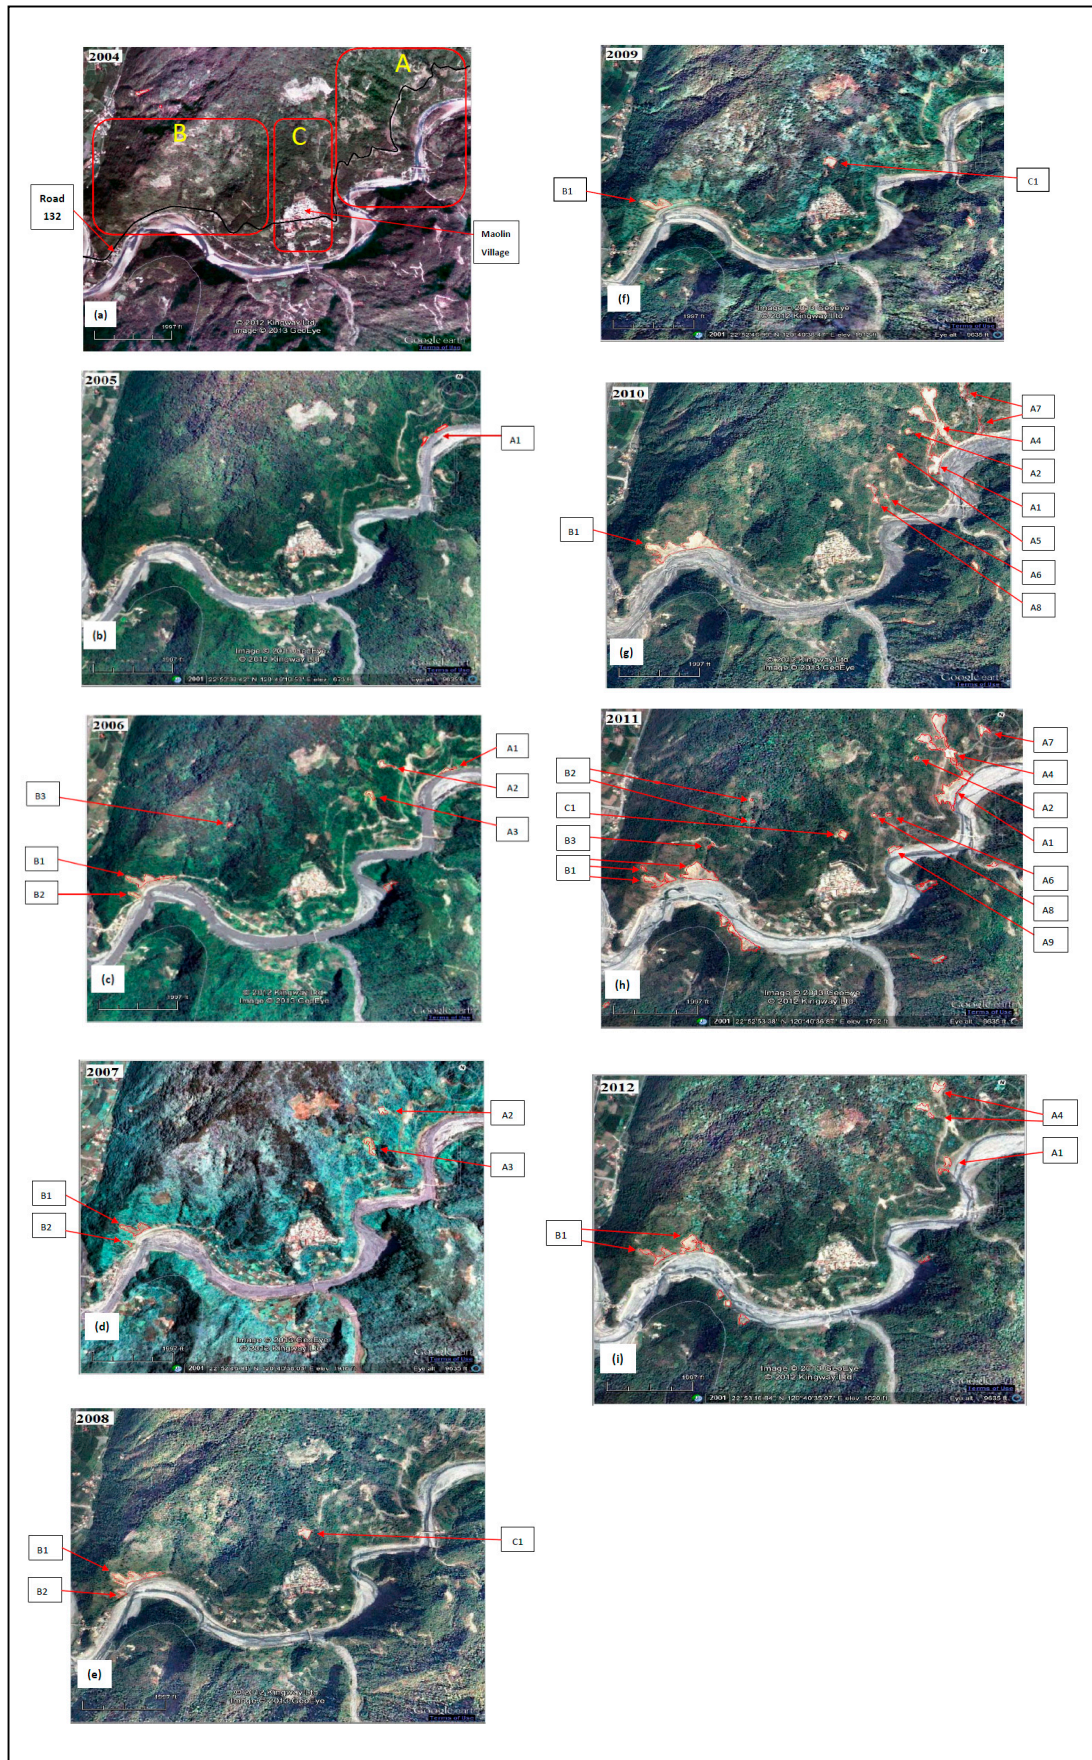



Wanshan Village, Landslide Inventory Results (2004-2012), Zones D, E. (Base Images: FS-2 displayed on Google Earth platform)

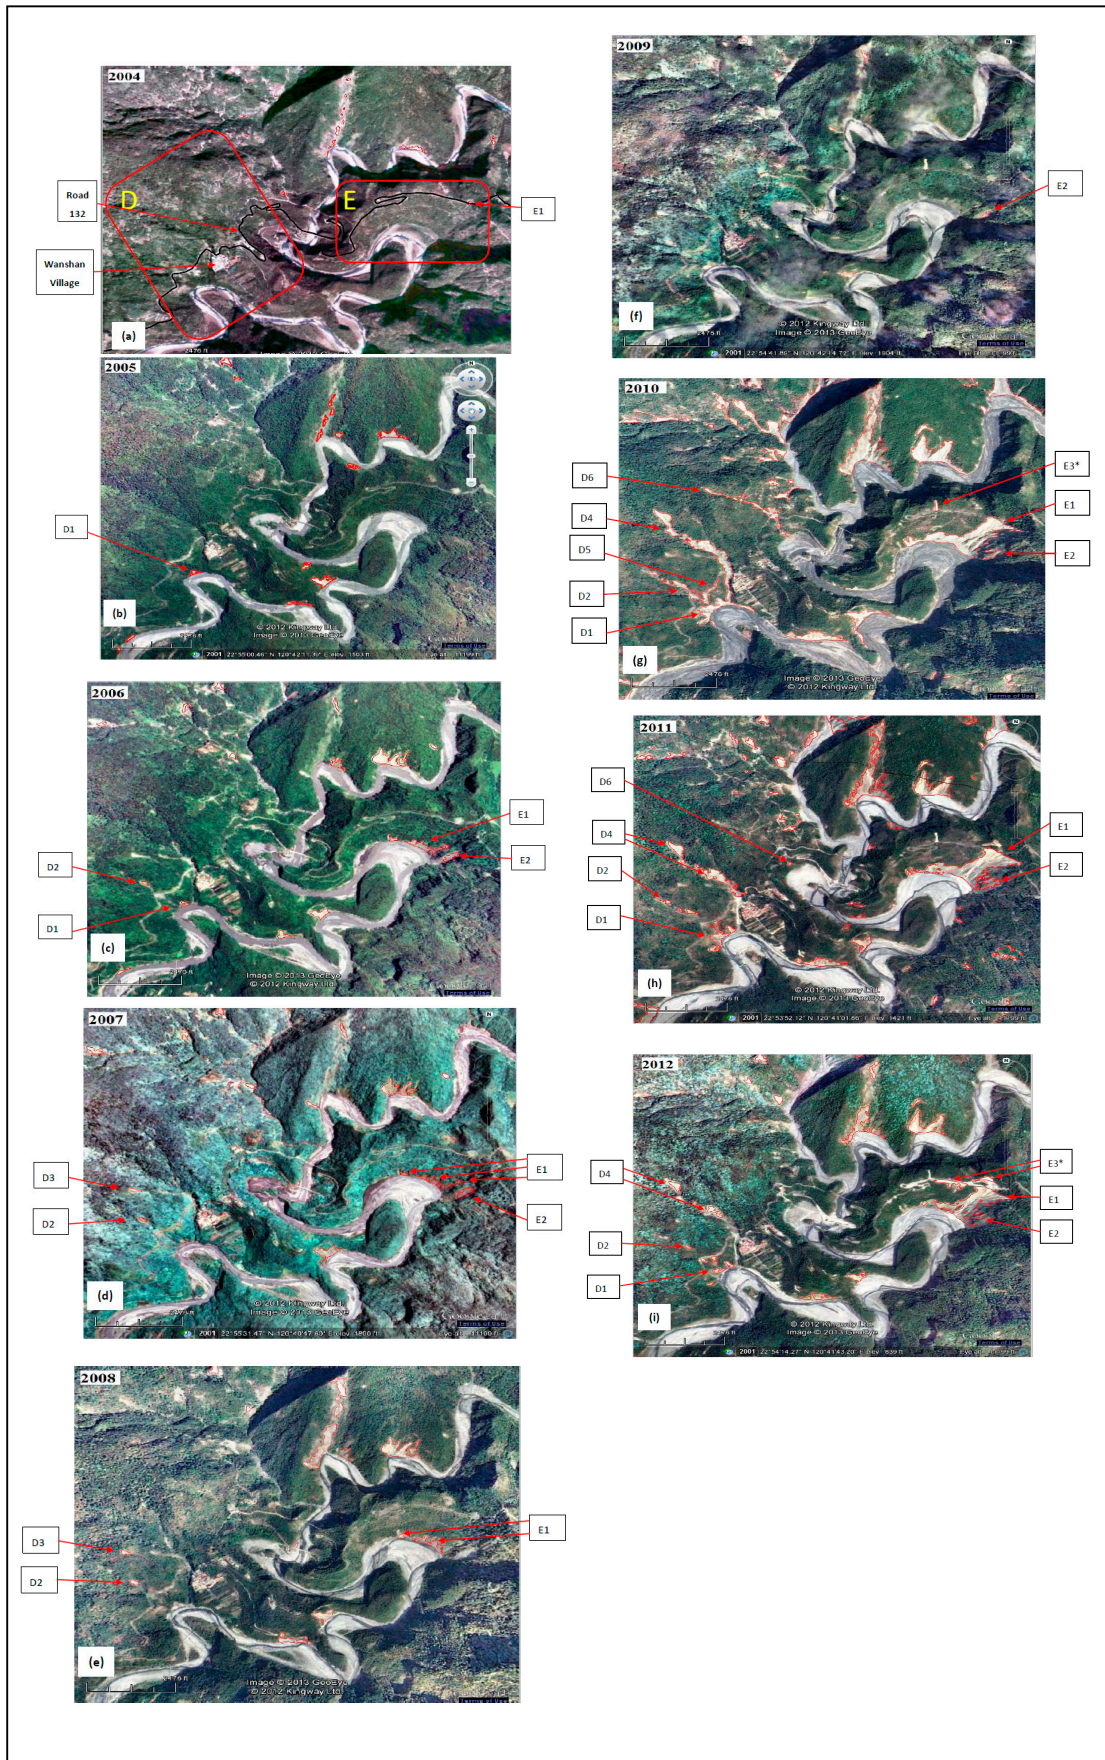



Dona Village, Landslide Inventory Results (2004- 2012), Zone E, F. (Base Images: FS-2 displayed on Google Earth platform)

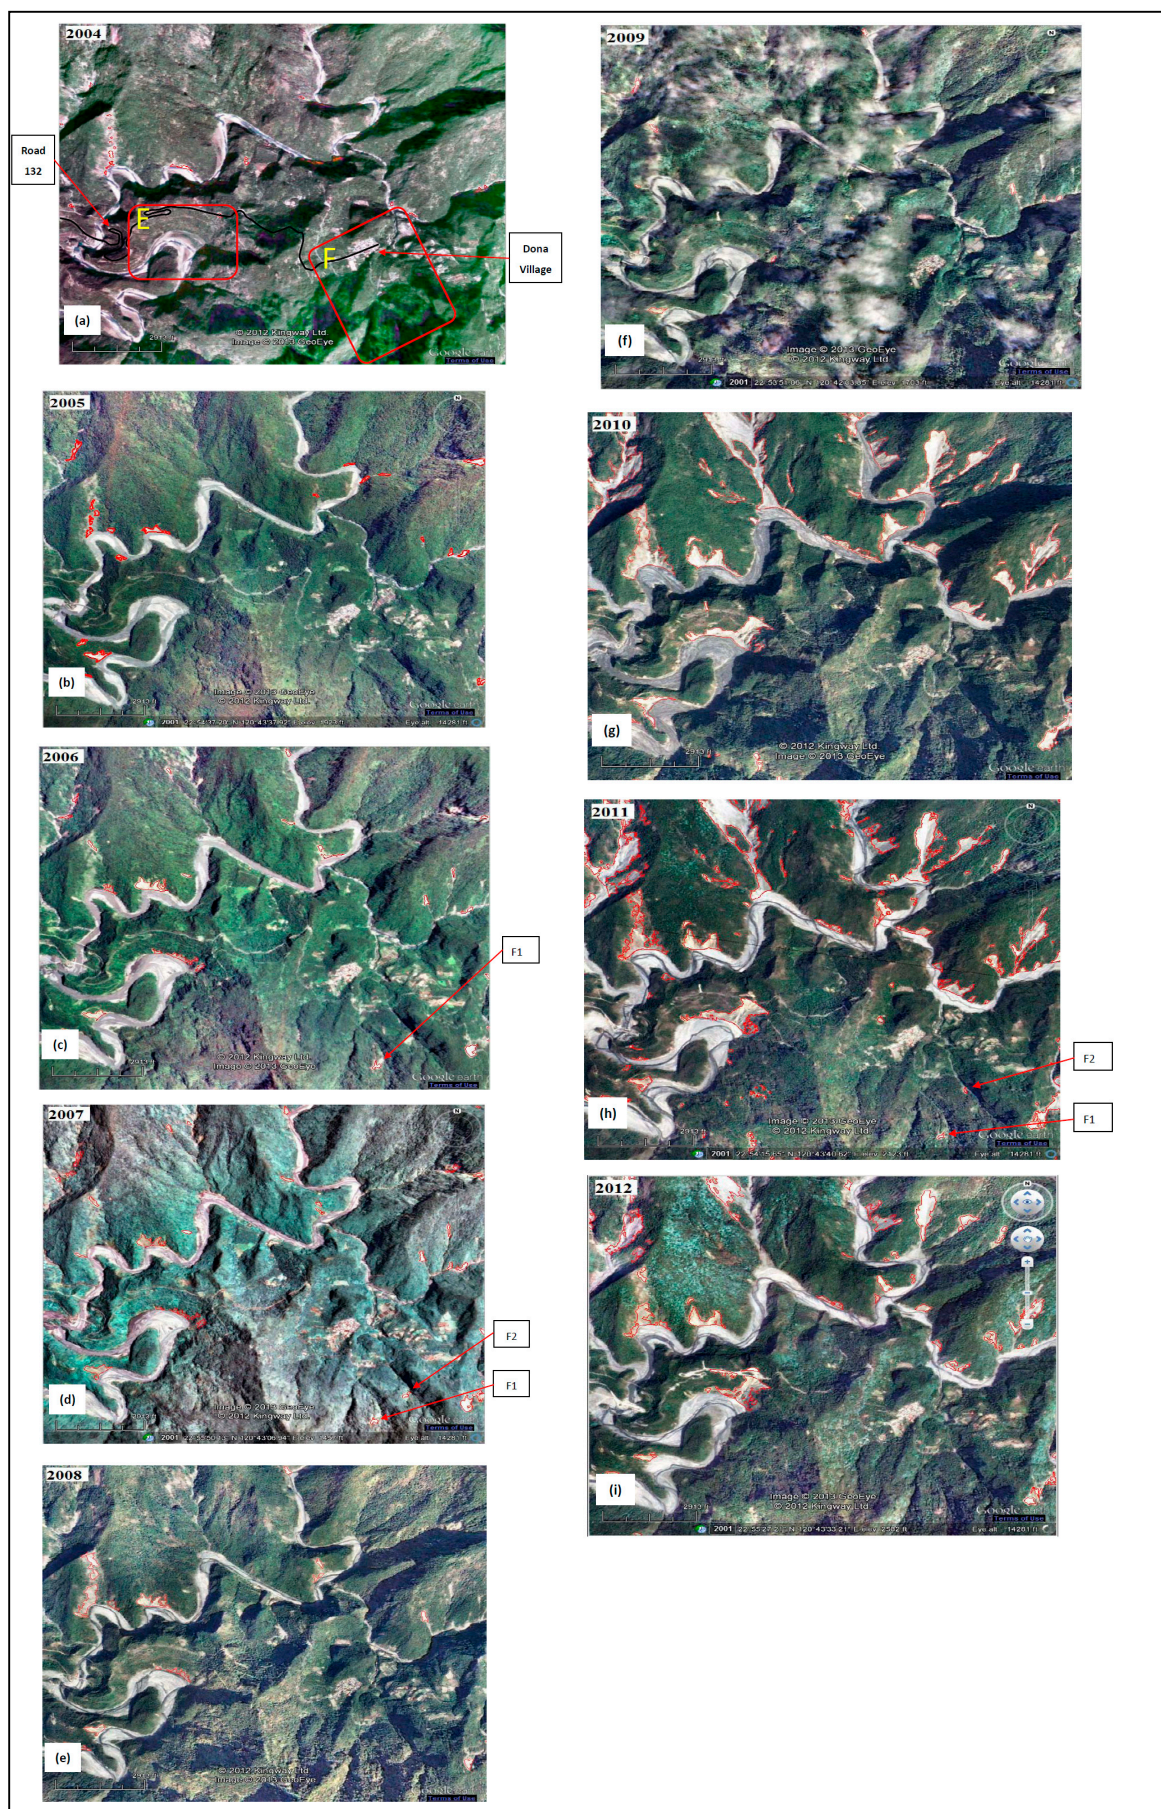



Supplementary Materials 3  
LSI vs Landslide Inventory (2004-2012) Results, Maolin District

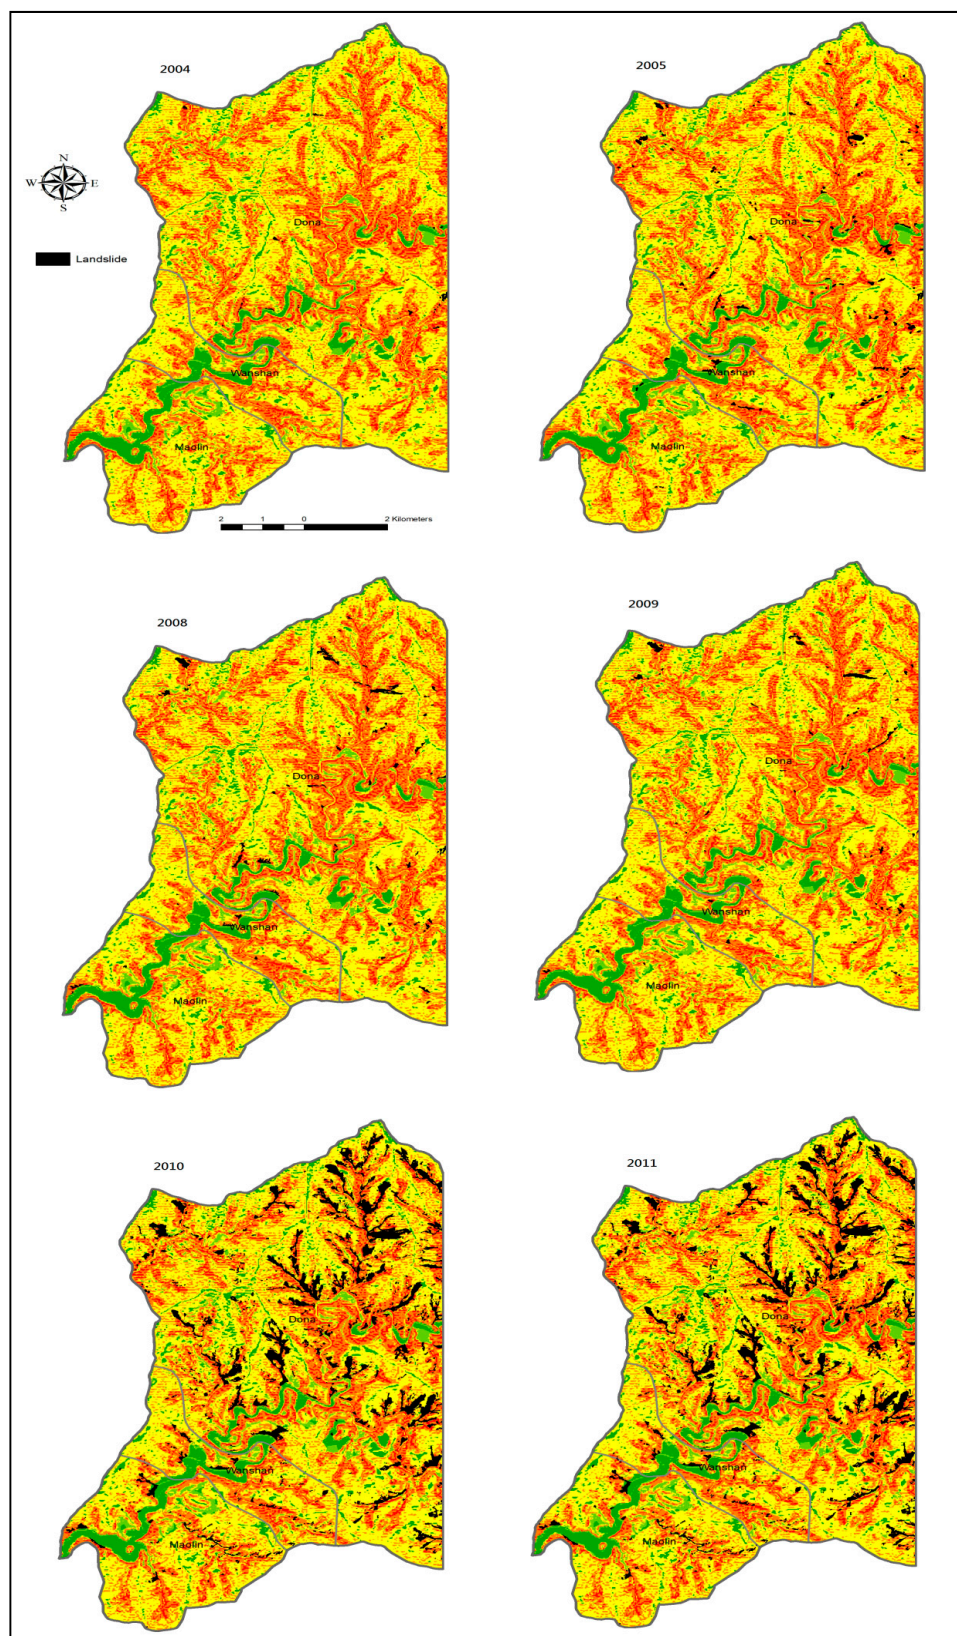



Supplementary Material 4

Questionnaire Results

Information and Awareness Questionnaire Results (1/3)

| Question                                                                             | Answer                                                          | Replies | C.I (%)  | Risk to Sustainability | Conclusion                                          |
|--------------------------------------------------------------------------------------|-----------------------------------------------------------------|---------|----------|------------------------|-----------------------------------------------------|
| 1. Do you know where the dangerous landslides/debris flows happen in your community? | A: A very good understanding, even more than the government     | 26      | 13 to 27 | High                   | - No clear understanding of where landslide happen  |
|                                                                                      | B: I understand based on what the government tells me           | 35      | 19 to 35 | High                   | - Unreliable replies shows lack of awareness        |
|                                                                                      | C: I only know some, but in fact I need to know more            | 57      | 35 to 53 | High                   |                                                     |
|                                                                                      | D: I do not know                                                | 6       | 1 to 8   | Low                    |                                                     |
|                                                                                      | Other: _____                                                    | 4       | 0.1 to 6 | Low                    |                                                     |
| Total no. of replies                                                                 |                                                                 | 130     |          |                        |                                                     |
| 2. Does everyone in your community know how to evacuate? And where to go?            | A: Yes, I know this from ___ to go to ___ (shelter)             | 67      | 43 to 60 | Low                    | - Dependence on government                          |
|                                                                                      | B: Government will make arrangements, so I do not need to worry | 31      | 17 to 31 | High                   | - Need for a community based system for evacuation. |
|                                                                                      | C: I do not know, because government will arrange.              | 22      | 10 to 23 | High                   |                                                     |
|                                                                                      | Other _____                                                     | 10      | 3 to 12  | Low                    |                                                     |
| Total no. of replies                                                                 |                                                                 | 130     |          |                        |                                                     |



Information and Awareness Questionnaire Results (2/3)

| Question                                                                                                       | Answer                                                        | Replies | C.I.(%)  | Risk to Sustainability | Conclusion                                                            |
|----------------------------------------------------------------------------------------------------------------|---------------------------------------------------------------|---------|----------|------------------------|-----------------------------------------------------------------------|
| 3. Do you have a computer? Do you have access t it?                                                            | A: Yes, I have a computer with internet access                | 90      | 64 to 79 | Low                    | - Computer can be a tool to access information and increase awareness |
|                                                                                                                | B: Yes, I have a computer but not internet connection         | 3       | 0.2 to 5 | Low                    |                                                                       |
|                                                                                                                | C: No, I do not have a computer or internet connected devices | 33      | 19 to 34 | Low                    |                                                                       |
| Total no. of replies                                                                                           |                                                               | 126     |          |                        |                                                                       |
| 4. Is there a person or people that you trust for information about landslides/debris flows in your community? | A:Yes, the person I trust is_____                             | 66      | 44 to 61 | Medium                 | - No clear information source, need to know what info is reliable     |
|                                                                                                                | B: No, the only reliable person is myself                     | 39      | 23 to 39 | High                   |                                                                       |
|                                                                                                                | Other_____                                                    | 21      | 10 to 23 |                        |                                                                       |
| Total no. of replies                                                                                           |                                                               | 126     |          |                        |                                                                       |



Information and Awareness Questionnaire Results (3/3)

| Question                                                      | Answer                                                                | Replies | C.I (%)  | Risk to Sustainability | Conclusion                                                |
|---------------------------------------------------------------|-----------------------------------------------------------------------|---------|----------|------------------------|-----------------------------------------------------------|
| 5. Do you know and understand your community evacuation plan? | A: Yes, and I feel it is very a complete plan                         | 40      | 23 to 39 | Medium                 | - Good overall understanding.                             |
|                                                               | B: Yes, but I think there is room for improvement, I suggest: _____   | 66      | 42 to 59 | Medium                 | - Should improve because geohazards occur annually        |
|                                                               | C: no or not enough, I prefer to believe in myself                    | 24      | 12 to 25 | Medium                 | - Need for a clear and easy to understand evacuation plan |
| Total no. of replies                                          |                                                                       | 130     |          |                        |                                                           |
|                                                               |                                                                       |         |          |                        |                                                           |
| 6. During a typhoon, where is a safe area?                    | A: Government Shelter                                                 | 53      | 32 to 49 | Medium                 | - No clear choice of where is safe                        |
|                                                               | B: I will stay home, because I think my home is the safest            | 36      | 20 to 35 | Medium                 | - Need to know where the best place to go is              |
|                                                               | C: nongovernment-designated shelter, but I will go (such as churches) | 39      | 22 to 38 | Medium                 | -Personal preference interferes with actual safe location |
|                                                               | Other _____                                                           | 2       | 0.5 to 3 | Low                    |                                                           |
| Total no. of replies                                          |                                                                       | 130     |          |                        |                                                           |

### Economy and Natural Capital Questionnaire Results (1/3)

| Question                                                                                                                                                                                                                | Answer                                           | Replies | C.I (%)  | Risk to Sustainability | Conclusion                                                 |
|-------------------------------------------------------------------------------------------------------------------------------------------------------------------------------------------------------------------------|--------------------------------------------------|---------|----------|------------------------|------------------------------------------------------------|
| 1. Do you work in your community?                                                                                                                                                                                       | A: Yes, I work in my community                   | 59      | 37 to 54 | Low                    | - Ideally, the more citizens working locally, the better   |
|                                                                                                                                                                                                                         | B: No, I work outside my community               | 25      | 12 to 26 | Medium                 | - Less travel reduces risk and lowers living costs         |
|                                                                                                                                                                                                                         | C: No. I don't have a job.                       | 32      | 17 to 32 | High                   | - Job creation is lacking                                  |
|                                                                                                                                                                                                                         | Other _____                                      | 14      | 5 to 16  | Medium                 |                                                            |
| Total no. of replies                                                                                                                                                                                                    |                                                  | 130     |          |                        |                                                            |
|                                                                                                                                                                                                                         |                                                  |         |          |                        |                                                            |
| 2. When the government is doing construction in your community, are there any additional benefits to your community?<br>Example: give priority hiring to local residents to participate in local construction projects. | A: Yes, I know that the following measures _____ | 12      | 4 to 14  | High                   | - Residents benefit with new roads                         |
|                                                                                                                                                                                                                         | B: Yes, there should be, but I do not know       | 94      | 64 to 80 | High                   | - No benefit of employment opportunities                   |
|                                                                                                                                                                                                                         | C: I know not, I suggest _____                   | 24      | 12 to 25 | High                   | - Lack of skilled training may have caused this situation. |
| Total no. of replies                                                                                                                                                                                                    |                                                  | 130     |          |                        |                                                            |



### Economy and Natural Capital Questionnaire Results (2/3)

| Question                                                                  | Answer                                                                                                               | Replies | C.I. (%) | Risk to Sustainability | Conclusion                                                                                    |
|---------------------------------------------------------------------------|----------------------------------------------------------------------------------------------------------------------|---------|----------|------------------------|-----------------------------------------------------------------------------------------------|
| 3. What do you hope for the Maolin District in the future?                | A: economic priority.<br>(Tourism, land development)                                                                 | 20      | 9 to 21  | Low                    | - Understand the importance of natural capital to their future                                |
|                                                                           | B: environment as a priority.<br>(Ecological protection, set up nature reserves and indigenous culture preservation) | 102     | 71 to 86 | Low                    | - Need for further development of environmental capital that sets the environment as priority |
|                                                                           | C: maintain the status quo                                                                                           | 4       | 0.1-6    | Low                    |                                                                                               |
|                                                                           | Other _____                                                                                                          | 4       | 0.1-6    | Low                    |                                                                                               |
| Total no. of replies                                                      |                                                                                                                      | 130     |          |                        |                                                                                               |
| 4. How often do you travel out of your community to shop for daily goods? | A : _____ per day                                                                                                    | 7       | 1 to 9   | Low                    | - No stores to supply locals with daily good                                                  |
|                                                                           | B: _____ per week                                                                                                    | 66      | 42-60    | High                   |                                                                                               |
|                                                                           | C : _____ per month                                                                                                  | 12      | 4 to 14  | Low                    | - No choice, must frequently leave community                                                  |
|                                                                           | D: go to town without any reason                                                                                     | 37      | 20-36    | Medium                 |                                                                                               |
|                                                                           | Other _____                                                                                                          | 8       | 2 to 10  | Low                    |                                                                                               |
| Total No. of Replies                                                      |                                                                                                                      | 130     |          |                        |                                                                                               |

### Economy and Natural Capital Questionnaire Results (3/3)

| Question                                                                                           | Answer                                                                                                                      | Replies | C.I (%)  | Risk to Sustainability | Conclusion                                                                          |
|----------------------------------------------------------------------------------------------------|-----------------------------------------------------------------------------------------------------------------------------|---------|----------|------------------------|-------------------------------------------------------------------------------------|
| 5. How could the government reduce the risk of debris flows/landslides that affect your community? | A: should increase the budget for the implementation of afforestation, road and construction projects to prevent landslides | 67      | 43 to 60 | Medium                 | - Residents want more to be done                                                    |
|                                                                                                    | B: maintain the status quo                                                                                                  | 21      | 9 to 22  | Medium                 | - Landslide will happen so there is need for adaptation to the changing environment |
|                                                                                                    | C: do less or do not do, because we cannot resist the forces of nature. Funds should be used in other areas, such as: _____ | 18      | 7 to 20  | Low                    |                                                                                     |
|                                                                                                    | Other, your suggestions: _____                                                                                              | 24      | 12 to 25 | Low                    |                                                                                     |
| Total No. of Replies                                                                               |                                                                                                                             | 130     |          |                        |                                                                                     |
